# Supplementary material for: Translation of the Weight-Related Behaviours Questionnaire into a Short-Form Psychosocial Assessment Tool for the Detection of Women at Risk of Excessive Gestational Weight Gain
Source: MDPI journal article supplement (doi:10.3390/ijerph18189522), 2021-09-09
Supplement: s1 [file s1]

### 1. Weight Locus of Control

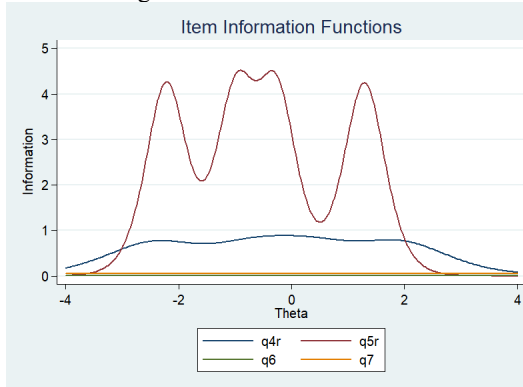

### 4. Body Image

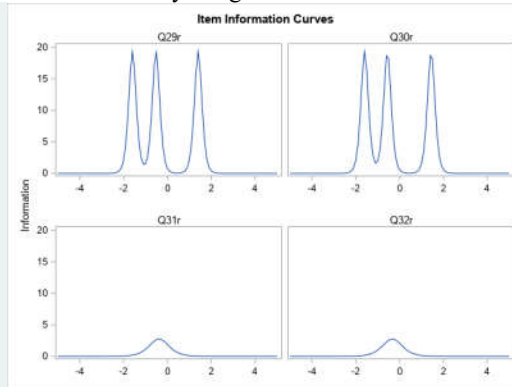

### 2. Self efficacy

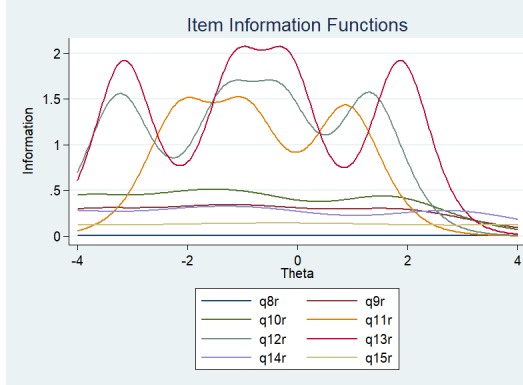

### 5. Feelings about the motherhood role

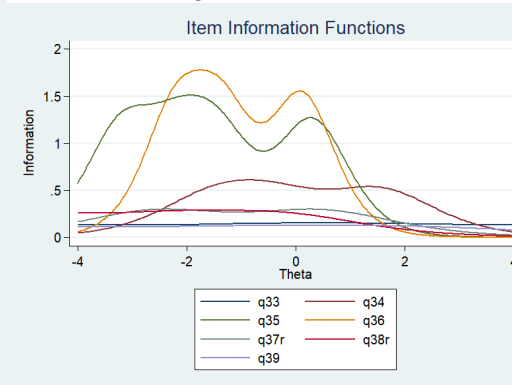

### 3. Attitudes towards weight gain

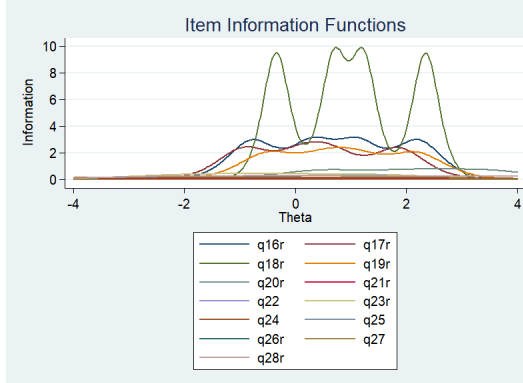

### 6. Career oreintation

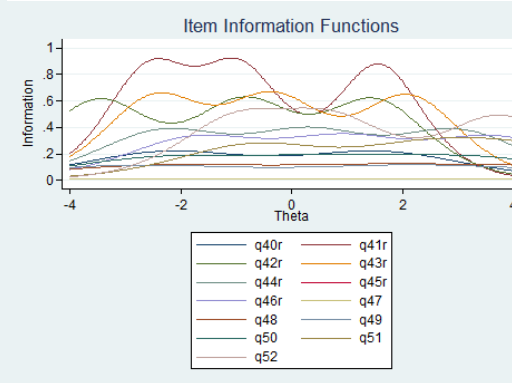

**Supplementary Figure S1.** Graphical Item Information function results.

*\*Note - Items numbererd from 4–52 for analysis purposes. These items are preresented as questionnaire items 1-49 within the main manuscript.*
